# Supplementary material for: Coordination polymers derived from alkali metal complexes of redox-active ligands
Source: Royal Society of Chemistry journal article supplement (doi:10.1039/d1ce01698a), 2022-01-01
Supplement: d1ce01698a1.pdf [file d1ce01698a1.pdf]

## Electronic Supplementary Information

### Coordination Polymers Derived from Alkali Metal Complexes of Redox-Active Ligands

Natalia L. Bazyakina, Mikhail V. Moskalev, Anton V. Cherkasov, Valentin M. Makarov and Igor L. Fedushkin\*

G.A. Razuvaev Institute of Organometallic Chemistry of Russian Academy of Sciences, 603950 Nizhny Novgorod, Tropinina str. 49, Russian Federation. E-mail: [igorfed@iomc.ras.ru](mailto:igorfed@iomc.ras.ru)

**Table S1.** Crystallographic data and structure refinement details for **1-3**.

|                                               | <b>1 (Li)</b>                                                     | <b>2 (Na)</b>                                                     | <b>3 (K)</b>                                                      |
|-----------------------------------------------|-------------------------------------------------------------------|-------------------------------------------------------------------|-------------------------------------------------------------------|
| Empirical Formula                             | C <sub>46</sub> H <sub>48</sub> LiN <sub>4</sub>                  | C <sub>56</sub> H <sub>56</sub> N <sub>6</sub> Na                 | C <sub>46</sub> H <sub>48</sub> KN <sub>4</sub>                   |
| <i>M</i>                                      | 663.82                                                            | 836.05                                                            | 695.98                                                            |
| <i>T</i> [K]                                  | 150                                                               | 100                                                               | 100                                                               |
| $\lambda$ [Å]                                 | 1.54184 (Cu)                                                      | 0.71073 (Mo)                                                      | 0.71073 (Mo)                                                      |
| Crystal system                                | Orthorhombic                                                      | Monoclinic                                                        | Monoclinic                                                        |
| Space group                                   | <i>Pca2</i> <sub>1</sub>                                          | <i>P2</i> <sub>1</sub> / <i>c</i>                                 | <i>P2</i> <sub>1</sub> / <i>n</i>                                 |
| <i>a</i> [Å]                                  | 19.7085(8)                                                        | 18.7293(11)                                                       | 9.6059(3)                                                         |
| <i>b</i> [Å]                                  | 12.4030(6)                                                        | 12.8174(8)                                                        | 17.2348(6)                                                        |
| <i>c</i> [Å]                                  | 32.0285(14)                                                       | 19.6609(12)                                                       | 23.4133(8)                                                        |
| $\alpha$ [deg]                                | 90                                                                | 90                                                                | 90                                                                |
| $\beta$ [deg]                                 | 90                                                                | 103.238(2)                                                        | 100.2090(10)                                                      |
| $\gamma$ [deg]                                | 90                                                                | 90                                                                | 90                                                                |
| <i>V</i> [Å <sup>3</sup> ]                    | 7829.2(6)                                                         | 4594.4(5)                                                         | 3814.8(2)                                                         |
| <i>Z</i>                                      | 8                                                                 | 4                                                                 | 4                                                                 |
| <i>d</i> <sub>calc</sub> [g/cm <sup>3</sup> ] | 1.126                                                             | 1.209                                                             | 1.212                                                             |
| $\mu$ [mm <sup>-1</sup> ]                     | 0.497                                                             | 0.079                                                             | 0.177                                                             |
| <i>F</i> <sub>000</sub>                       | 2840                                                              | 1780                                                              | 1484                                                              |
| Crystal dimensions [mm]                       | 0.44 × 0.27 × 0.11                                                | 0.34 × 0.19 × 0.15                                                | 0.41 × 0.12 × 0.08                                                |
| $\theta$ range [deg]                          | 2.76 – 66.60                                                      | 2.23 – 26.11                                                      | 2.13 – 28.70                                                      |
| <i>hkl</i> indices                            | -23 ≤ <i>h</i> ≤ 20<br>-14 ≤ <i>k</i> ≤ 11<br>-38 ≤ <i>l</i> ≤ 37 | -23 ≤ <i>h</i> ≤ 23<br>-15 ≤ <i>k</i> ≤ 15<br>-24 ≤ <i>l</i> ≤ 24 | -12 ≤ <i>h</i> ≤ 12<br>-23 ≤ <i>k</i> ≤ 23<br>-31 ≤ <i>l</i> ≤ 31 |

|                                                     | <b>1 (Li)</b>   | <b>2 (Na)</b>   | <b>3 (K)</b>    |
|-----------------------------------------------------|-----------------|-----------------|-----------------|
| Reflections collected                               | 31124           | 57742           | 61367           |
| Independent reflns ( $I > 2\sigma(I)$ )             | 10118           | 6986            | 7703            |
| $R_{int}$                                           | 0.0660          | 0.0913          | 0.0466          |
| Completeness to $\theta$ , %                        | 100.0           | 99.4            | 100.0           |
| Data / Restraints / Parameters                      | 13320/194/1058  | 9086/0/576      | 9843/0/652      |
| $S(F^2)$                                            | 1.061           | 1.044           | 1.015           |
| Flack parameter                                     | 0.0(3)          |                 |                 |
| $R_1 / wR_2 (I > 2\sigma(I))$                       | 0.0883 / 0.1957 | 0.0482 / 0.1012 | 0.0447 / 0.0978 |
| $R_1 / wR_2$ (all data)                             | 0.1121 / 0.2116 | 0.0707 / 0.1112 | 0.0646 / 0.1068 |
| Largest diff. peak and hole<br>[ $e/\text{\AA}^3$ ] | 0.23 / -0.24    | 0.23 / -0.29    | 0.52 / -0.34    |

**Table S2.** Selected bond lengths [ $\text{\AA}$ ] and angles [ $^\circ$ ] for complexes **1-3**.

|              | <b>1 (Li)</b> | <b>2 (Na)</b> | <b>3 (K)</b> |
|--------------|---------------|---------------|--------------|
| <b>Bond</b>  |               |               |              |
| M(1)–N(1)    | 2.078(17)     | 2.3974(15)    | 2.7310(11)   |
| M(1)–N(2)    | 2.022(16)     | 2.4775(14)    | 2.7453(12)   |
| M(1)–N(3)    | 2.054(16)     | 2.5338(15)    | 2.8020(13)   |
| M(1)–N(4)    | 1.99(3)       | 2.4946(15)    | 2.8792(12)   |
| M(1)–N(5)    | -             | 2.4697(16)    | -            |
| N(1)–C(1)    | 1.329(10)     | 1.330(2)      | 1.3244(17)   |
| N(2)–C(2)    | 1.344(10)     | 1.325(2)      | 1.3171(17)   |
| C(1)–C(2)    | 1.445(12)     | 1.456(2)      | 1.4552(18)   |
| N(3)–C(37)   | 1.337(11)     | 1.333(2)      | 1.340(2)     |
| N(3)–C(41)   | 1.341(10)     | 1.342(2)      | 1.340(2)     |
| N(4)–C(42)   | -             | 1.334(2)      | -            |
| N(4)–C(46)   | -             | 1.332(2)      | -            |
| C(37)–C(38)  | 1.390(11)     | 1.383(2)      | 1.386(2)     |
| C(38)–C(39)  | 1.392(11)     | 1.390(2)      | 1.3933(19)   |
| C(39)–C(39') | 1.484(10)     | 1.487(3)      | 1.4840(19)   |

|                | <b>1 (Li)</b> | <b>2 (Na)</b> | <b>3 (K)</b> |
|----------------|---------------|---------------|--------------|
| C(39)–C(40)    | 1.400(10)     | 1.393(2)      | 1.391(2)     |
| C(40)–C(41)    | 1.385(11)     | 1.379(3)      | 1.382(2)     |
| N(5)–C(47)     |               | 1.337(2)      |              |
| N(5)–C(51)     |               | 1.341(2)      |              |
| C(47)–C(48)    |               | 1.382(2)      |              |
| C(48)–C(49)    |               | 1.392(2)      |              |
| C(49)–C(50)    |               | 1.389(2)      |              |
| C(50)–C(51)    |               | 1.383(2)      |              |
| C(49)–C(52)    |               | 1.389(2)      |              |
| <b>Angle</b>   |               |               |              |
| N(1)–M(1)–N(2) | 86.3(6)       | 71.44(5)      | 62.03(3)     |
| N(1)–M(1)–N(3) | 102.4(9)      | 109.83(5)     | 151.36(4)    |
| N(1)–M(1)–N(4) | 110.0(7)      | 91.23(5)      | 88.85(3)     |
| N(2)–M(1)–N(3) | 109.3(8)      | 100.15(5)     | 121.14(4)    |
| N(2)–M(1)–N(4) | 119.8(10)     | 161.26(5)     | 148.29(3)    |
| N(4)–M(1)–N(3) |               | 92.29(5)      | 78.24(4)     |
| N(5)–M(1)–N(2) |               | 101.32(5)     | -            |
| N(5)–M(1)–N(3) |               | 83.83(5)      | -            |
| N(5)–M(1)–N(4) |               | 93.87(5)      | -            |
| N(1)–M(1)–N(5) |               | 165.23(6)     | -            |

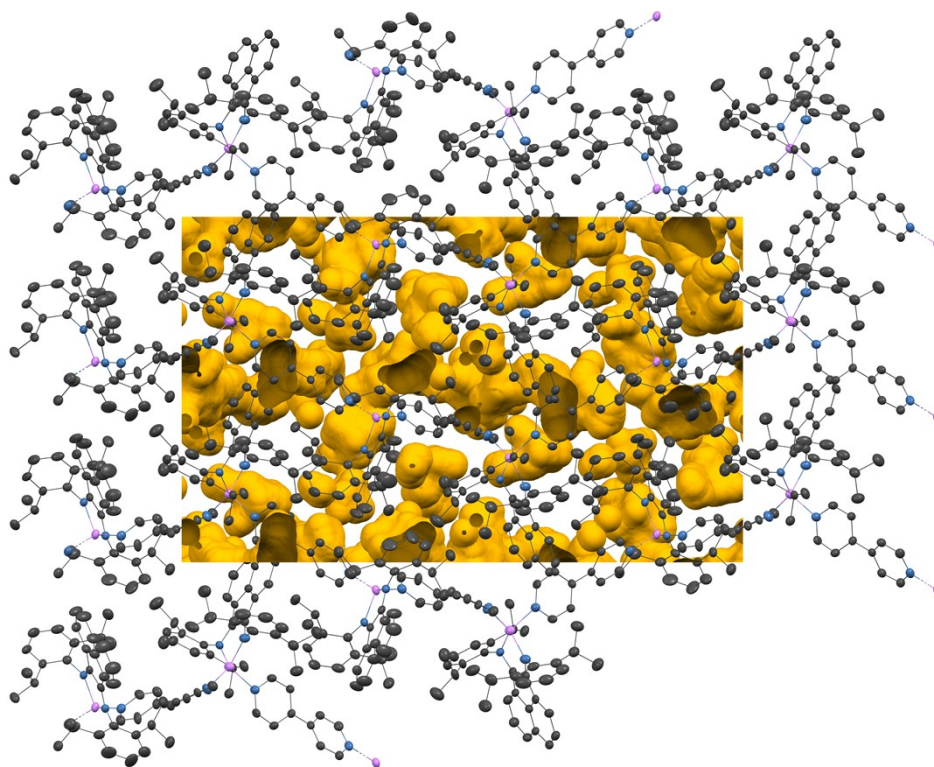

**Figure S1.** The Mercury visualization of voids volume (probe radius is 0.8 Å, approximating grid spacing is 0.1 Å) in **1**.

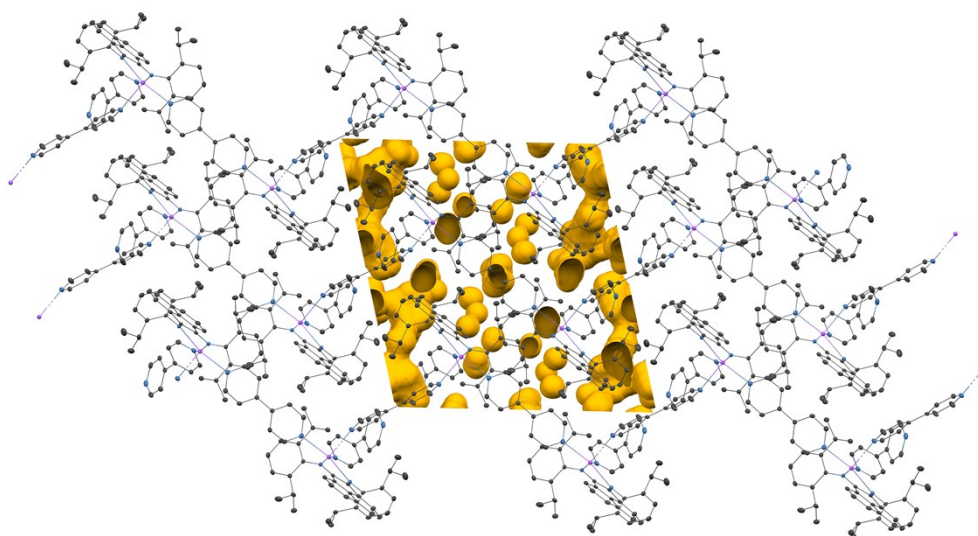

**Figure S2.** The Mercury visualization of voids volume (probe radius is 0.8 Å, approximating grid spacing is 0.1 Å) in **2**.

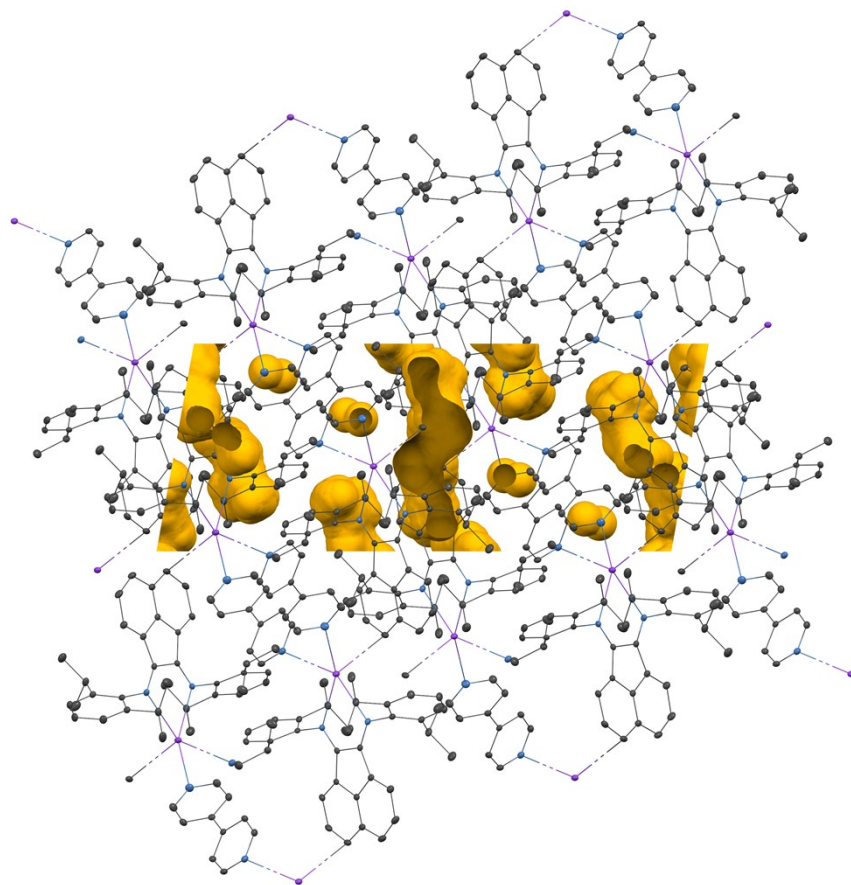

**Figure S3.** The Mercury visualization of voids volume (probe radius is 0.8 Å, approximating grid spacing is 0.1 Å) in **3**.
